# Supplementary material
Source: Springer Nature journal article supplement (https://www.springermedizin.de/resource/supplementary/12937_2009_270_MOESM5_ESM.pdf/25654754)

**A.**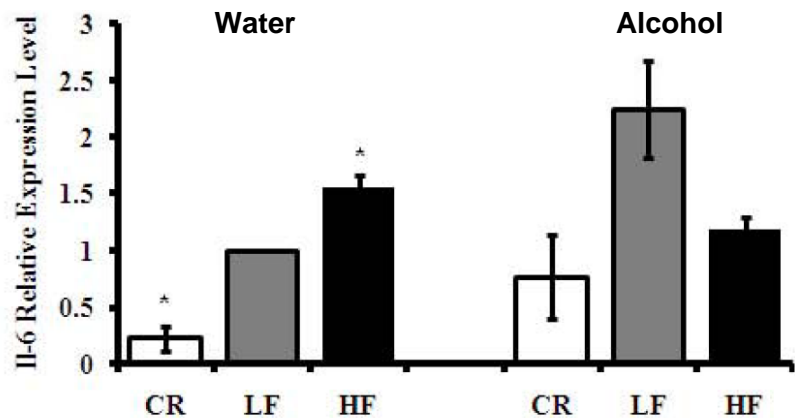**B.**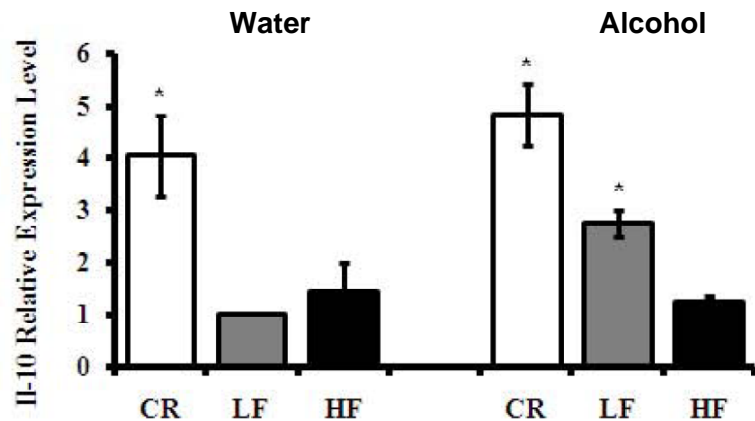**C.**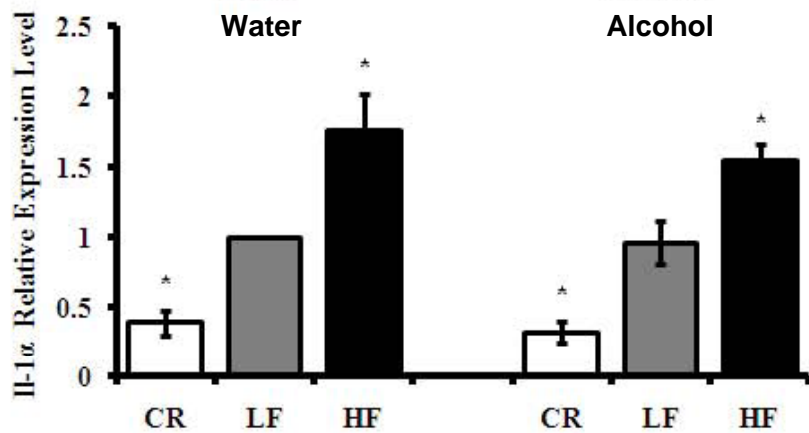**D.**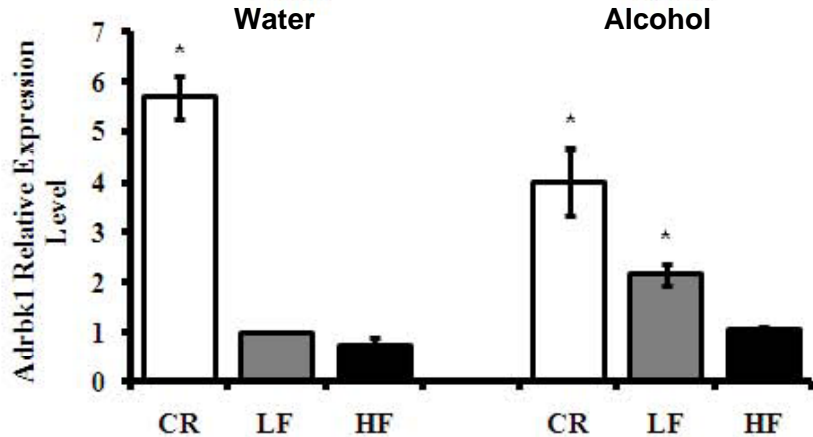

Supplement: MOESM5 [file 25654754]
